# Supplementary material for: A large new subset of TRIM genes highly diversified by duplication and positive selection in teleost fish
Source: PubMed Central journal article supplement (PMC2657112; doi:10.1186/1741-7007-7-7), 2009-02-05

Fig. S1A - tree based on RBB domains

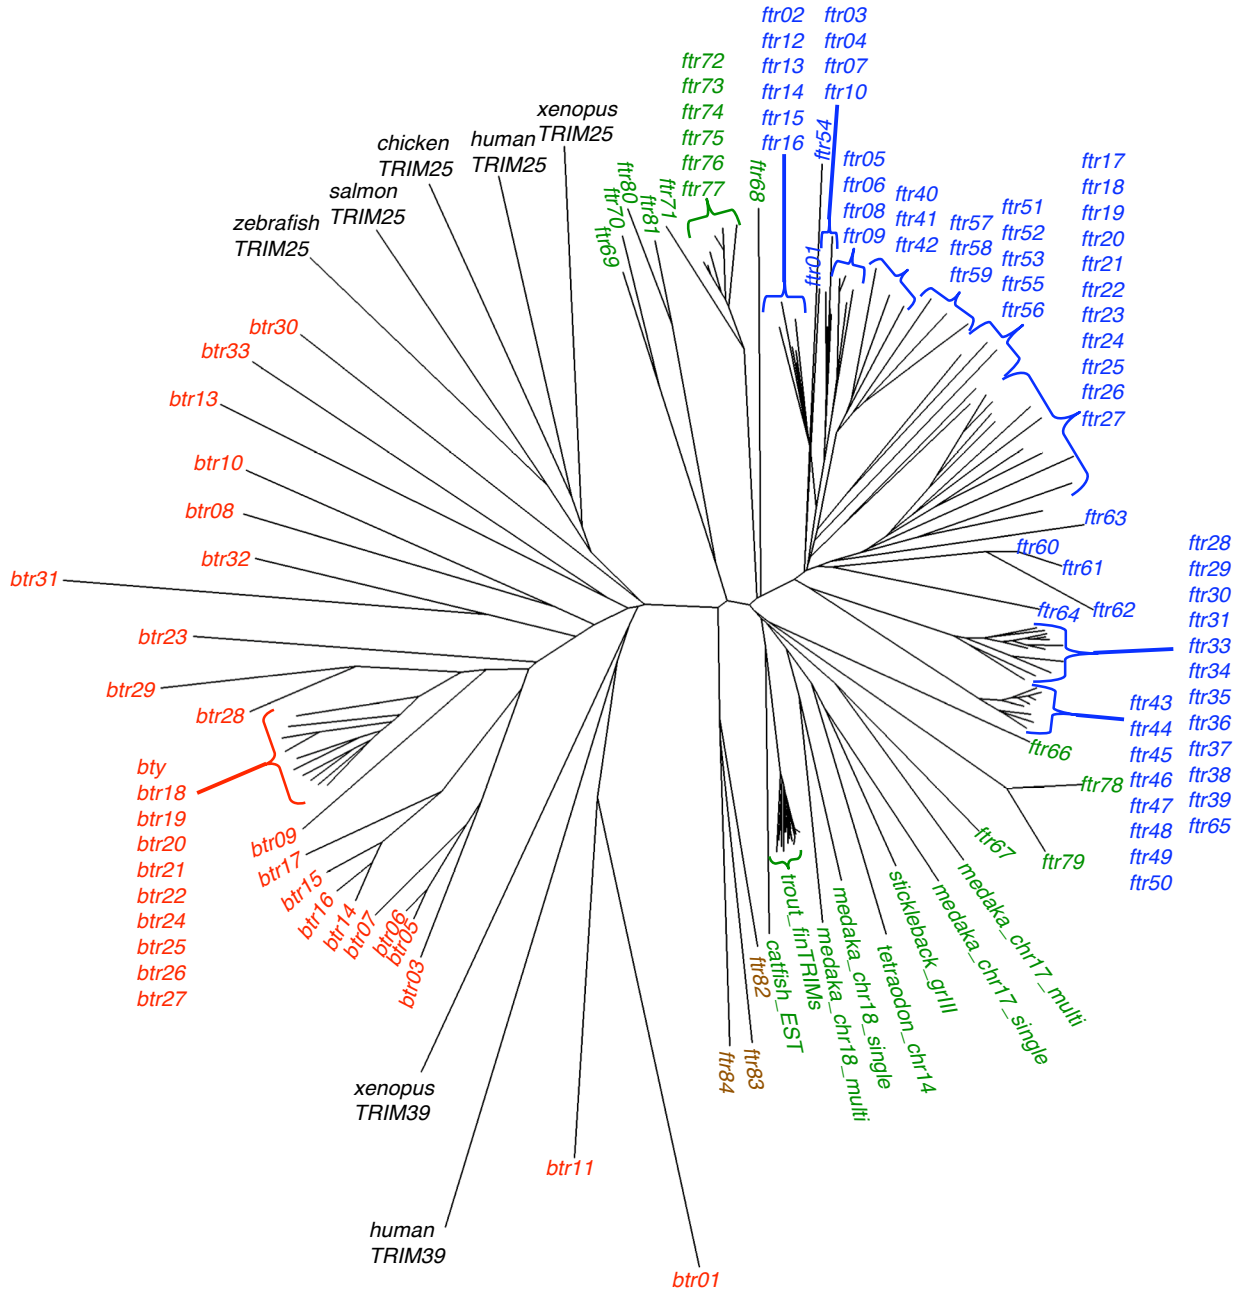

Fig. S1B - tree based on B30.2 domains

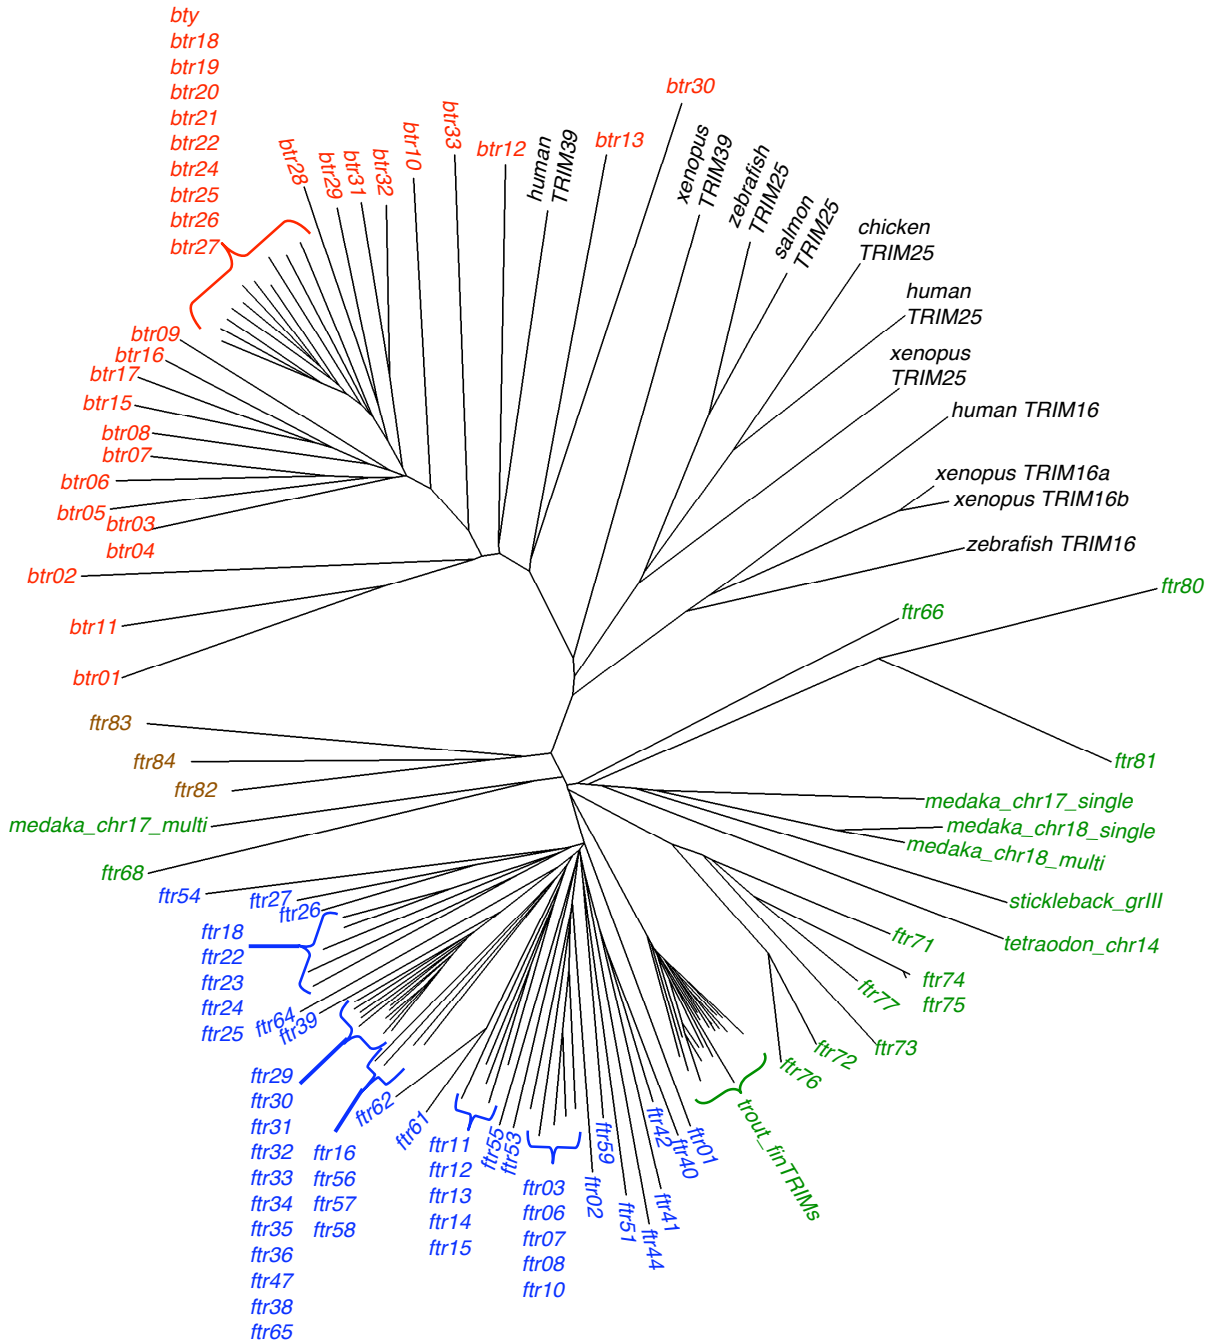

Supplement: 1741-7007-7-7-S1.pdf [file 1741-7007-7-7-S1.pdf]
