# Supplementary material for: A large new subset of TRIM genes highly diversified by duplication and positive selection in teleost fish
Source: PubMed Central journal article supplement (PMC2657112; doi:10.1186/1741-7007-7-7), 2009-02-05
Supplement: 1741-7007-7-7-S3.pdf [file 1741-7007-7-7-S3.pdf]

**Supplementary table S2 : *ftt*-like genes in other teleosts.**

Significant blastp hits from Ab initio databases associated to genome sequences of medaka, stickleback and tetraodon at Ensembl.

The ensembl name of the hits and the location on the chromosome are indicated

| Medaka             |         |             |            |             |
|--------------------|---------|-------------|------------|-------------|
| Name               | Name    | Start (AUG) | End (stop) | Nb of exons |
| GENSCAN00000110958 | Chr:1   | 34177110    | 34174613   | 6           |
| GENSCAN00000036476 | Chr:14  | 22419892    | 22424198   | 6           |
| GENSCAN00000093499 | Chr:14  | 22413866    | 22410525   | 7           |
| GENSCAN00000025963 | Chr:14  | 2439654     | 2442003    | 1           |
| GENSCAN00000091525 | Chr:15  | 21564724    | 21562240   | 6           |
|                    |         | 11616787    |            | 1           |
| GENSCAN00000018074 | Chr:17  |             | 11618454   | 4           |
|                    |         | 30120311    |            | 4           |
| GENSCAN00000045821 | Chr:17  |             | 30122866   | 1           |
| GENSCAN00000108815 | Chr:17  | 8244213     | 8245700    | 1           |
| GENSCAN00000018500 | Chr:17  | 8269326     | 8270972    | 1           |
| GENSCAN00000070019 | Chr:17  | 8279510     | 8277849    | 1           |
| GENSCAN00000018504 | Chr:17  | 8262618     | 8260954    | 1           |
| GENSCAN00000097849 | Chr:17  | 8965648     | 8967166    | 1           |
| GENSCAN00000047786 | Chr:17  | 8631857     | 8630240    | 1           |
| GENSCAN00000057649 | Chr:17  | 10036207    | 10034605   | 1           |
| GENSCAN00000073091 | Chr:17  | 10068191    | 10066680   | 1           |
| GENSCAN00000032774 | Chr:17  | 9045824     | 9047394    | 1           |
| GENSCAN00000022620 | Chr:17  | 483769      | 482269     | 1           |
| GENSCAN00000022520 | Chr:17  | 445369      | 444092     | 1           |
| GENSCAN00000069132 | Chr:17  | 8412274     | 8410262    | 1           |
| GENSCAN00000054450 | Chr:17  | 8852669     | 8851349    | 1           |
| GENSCAN00000045819 | Chr:17  | 30125876    | 30132497   | 6           |
| GENSCAN00000035461 | Chr:17  | 8231476     | 8233143    | 1           |
| GENSCAN00000085752 | Chr:17  | 10081045    | 10079334   | 1           |
| GENSCAN00000086075 | Chr:17  | 9489929     | 9491139    | 1           |
| GENSCAN00000104494 | Chr:17  | 9475337     | 9476887    | 1           |
| GENSCAN00000055448 | Chr:17  | 9074171     | 9075448    | 1           |
| GENSCAN00000055706 | Chr:17  | 8250312     | 8251708    | 1           |
| GENSCAN00000075396 | Chr:17  | 8703396     | 8704995    | 1           |
| GENSCAN00000018446 | Chr:17  | 10046106    | 10044564   | 1           |
| ENSORLG00000006248 | Chr :17 | 8833339     | 8833350    | 1           |

|                    |                |          |          |        |
|--------------------|----------------|----------|----------|--------|
| GENSCAN00000071710 | Chr :17        | 9100254  | 9101691  | 1      |
| GENSCAN00000112517 | Chr :17        | 10013153 | 10014770 | 1      |
| GENSCAN00000056194 | Chr :17        | 9564886  | 9563350  | 1      |
| ENSORLG00000006437 | Chr :17        | 9637113  | 9635985  | 1      |
| GENSCAN00000117671 | Chr:18         | 2254254  | 2252608  | 1      |
| GENSCAN00000029902 | Chr:18         | 2688084  | 2689760  | 1      |
| GENSCAN00000005659 | Chr:18         | 2868240  | 2870009  | 1      |
| GENSCAN00000095092 | Chr:18         | 2406731  | 2405049  | 1      |
| GENSCAN00000021057 | Chr:18         | 29403660 | 29402189 | 1      |
| GENSCAN00000004320 | Chr:18         | 25058223 | 25059432 | 1      |
| GENSCAN00000113407 | Chr:18         | 28915816 | 28916568 | 1      |
| GENSCAN00000025515 | Chr:18         | 26859049 | 26859060 | 2      |
| GENSCAN00000066497 | Chr:18         | 2708259  | 2709922  | 1      |
| ENSORLG00000010802 | Chr :18        | 26846784 | 26847049 | 1      |
| ENSORLG00000010794 | Chr :18        | 26721724 | 26719292 | 1 or 2 |
| GENSCAN00000105092 | Chr :18        | 26875201 | 26876164 | 1      |
| GENSCAN00000116846 | Chr :18        | 2692271  | 2693430  | 1      |
| GENSCAN00000070512 | Chr :18        | 2436609  | 2437958  | 1      |
| GENSCAN00000070508 | Chr :18        | 2439665  | 2441302  | 1      |
| GENSCAN00000115691 | Chr:2          | 23838584 | 23845615 | 6      |
| GENSCAN00000079805 | Chr:21         | 13166342 | 13167378 | 1      |
| GENSCAN00000062051 | Chr:24         | 23288265 | 23286613 | 1      |
| GENSCAN00000047149 | Chr:5          | 11676226 | 11674517 | 1      |
| GENSCAN00000032159 | Chr:6          | 26441168 | 26442661 | 1      |
| GENSCAN00000059700 | Chr:6          | 26487403 | 26493807 | 5      |
| GENSCAN00000015195 | Scaffold1875   | 3213     | 3822     | 1      |
| GENSCAN00000070218 | Scaffold2084   | 11300    | 12958    | 1      |
| GENSCAN00000065517 | Ultracontig90  | 2034459  | 2035181  | 1      |
| GENSCAN00000053909 | Scaffold877    | 53000    | 54058    | 1      |
| GENSCAN00000027868 | Ultracontig236 | 2139973  | 2142153  | 1      |
| GENSCAN00000058260 | Scaffold3348   | 3960     | 5604     | 1      |
| GENSCAN00000058503 | Scaffold3544   | 2917     | 1674     | 1      |
| GENSCAN00000116323 | Ultracontig218 | 161435   | 160647   | 1      |
| GENSCAN00000107211 | scaffold785    | ~50000   |          | 1      |
| GENSCAN00000020147 | Scaffold3061   | 4013     | 2406     | 3+     |
| GENSCAN00000044369 | scaffold1708   | ~16000   |          | 1      |
| GENSCAN00000019337 | scaffold2982   | 3168     | 2624     | 1      |

|                    |              |        |       |     |
|--------------------|--------------|--------|-------|-----|
| GENSCAN00000060761 | Scaffold717  | 92332  | 93006 | 1   |
| GENSCAN00000062026 | scaffold4570 | 3439   | 4332  | 1   |
| GENSCAN00000100797 | Scaffold907  | 58556  | 57782 | 1   |
| GENSCAN00000034217 | scaffold5209 | 3344   | 3775  | 1   |
| GENSCAN00000086620 | scaffold3964 | 630    | <1    | 1 ? |
| GENSCAN00000122477 | Scaffold757  | ~56000 | ?     | 1   |
| GENSCAN00000108983 | scaffold5344 | 2934   | 1860  | 1   |
| GENSCAN00000117118 | Scaffold1690 | 9731   | 10933 | 1   |
| GENSCAN00000051507 | Scaffold510  | ~39000 |       | ?   |
| GENSCAN00000075770 | Scaffold4611 | 5113   | >5436 | ?   |
| GENSCAN00000063126 | Scaffold2318 | ~8000  | ?     | ?   |
| GENSCAN00000090553 | scaffold3635 | ~2000  | ?     | ?   |

Stickleback

| Subject Name       | Chromosome Name | Start    | End      |
|--------------------|-----------------|----------|----------|
| GENSCAN00000022585 | Chr:groupIII    | 14324861 | 14325445 |
| GENSCAN00000036462 | Chr:groupIII    | 14109694 | 14110287 |
| GENSCAN00000023536 | Chr:groupIII    | 13188065 | 13188691 |
| GENSCAN00000030816 | Chr:groupIII    | 14269828 | 14270412 |
| GENSCAN00000039642 | Chr:groupVII    | 1860109  | 1861302  |
| GENSCAN00000039635 | Chr:groupVII    | 1872250  | 1873691  |
| GENSCAN00000039669 | Chr:groupVII    | 14230586 | 14232343 |
| GENSCAN00000019900 | No data         |          |          |

Tetraodon

| Subject Name    | Chromosome Name | Start    | End      |
|-----------------|-----------------|----------|----------|
| GIDT00016540001 | Chr: 14         | 9469225  | 9469803  |
| GIDT00014255001 | Chr: 17         | 5530066  | 5530290  |
| GIDT00020308001 | Chr: 18         | 1067127  | 1067760  |
| GIDT00025424001 | Chr: 18         | 9779431  | 9779721  |
| GIDT00016155001 | Chr: 3          | 3889493  | 3893052  |
| GIDT00014126001 | Chr: 7          | 1604391  | 1605994  |
| GIDT00014125001 | Chr: 7          | 1609252  | 1610292  |
| GIDT00021469001 | Chr: 9          | 2193382  | 2193681  |
| GIDT00025216001 | Un_random       | 16652089 | 16652679 |
